# Supplementary material for: Exploring the Cultivable Ectocarpus Microbiome
Source: Front Microbiol. 2017 Dec 11;8:2456. doi: 10.3389/fmicb.2017.02456 (PMC5732352; doi:10.3389/fmicb.2017.02456)
Supplement: TABLE S1 — Bacterial growth media recipes for LB, R2A, Zobell, PYG, EC-based, and LNHM. [file Table_1.XLSX]

## Sheet: R2A
	1. R2A
	Chemical compound	quantity per L medium
Standard recipe for R2A agar	Peptone	0.5 g
	CasoAmino acids	0.5 g
	yeast exctract	0.5 g
	dextrose	0.5 g
	starch*	0.5 g
	KPO4	0.3 g
	MgSO4	0.05 g
	Na-Pyruvate	0.3 g
	Agar	15 g
	Distilled water	1000 ml
Adjustments to the standard recipe for R2A agar	2. R2A prepared in natural seawater (R2A-NSW)
	See R2A; add 1000 ml Natural seawater instead of distilled water
	3. R2A prepared in 20-fold diluted natural seawater (R2A-DNSW)
	See R2A; dissolve in 50 ml Natural seawater and 950 ml distilled water
	4. R2A prepared in natural seawater and 20-fold dilution of all nutrients (dR2A-NSW)
	Peptone	0.025 g
	CasoAmino acids	0.025 g
	yeast exctract	0.025 g
	dextrose	0.025 g
	starch*	0.025 g
	KPO4	0.015 g
	MgSO4	0.0025 g
	Na-Pyruvate	0.015 g
	Agar	15 g
	Natural Seawater	1000 ml
	4. R2A prepared in diluted natural seawater and 20-fold dilution of all nutrients (dR2A-DNSW)
	see dR2A-NSW; dissolve in 50 ml seawater and 950 ml distilled water
* in the liquid version of the R2A medium, starch is replaced by alginate;

## Sheet: Zobell
	1. Zobell marine agar (ZOB)
	Chemical compound	quantity per L medium
Standard recipe for Zobell marine agar	Tryptone	5 g
	Yeast extract	1 g
	Agar	15 g
	Natural Seawater (NSW)	800 ml
	Distilled water	200 ml
Adjustments to the standard recipe for Zobell marine agar	2. Zobell marine agar with 16-fold reduced salinity (ZOB-DNSW)
	see ZOB but dissolve in 200 ml NSW and 800 ml distilled water
	3. Zobell marine agar with 20-fold dilution of nutrients (dZOB)
	Tryptone	0.25 g
	Yeast extract	0.05 g
	Agar	15 g
	Natural Seawater (NSW)	800 ml
	Distilled water	200 ml
	4. Zobell marine agar with 20-fold dilution of nutrients and 16-fold reduced salinity (dZOB-DNSW)
	see dZOB, but dissolve in 200 ml NSW and 800 ml distilled water

## Sheet: LNHM
Low Nutrient Heterotrophic Medium
Chemical class	Chemical compound	Qµantity per L medium
Carbohydrates	D-glucose (C6H12O6)	10 mg
Carbohydrates	D-ribose (C5H10O5)	10 mg
Carbohydrates	Sodium-succinate-dibasic hexahydrate (C4H4Na2O4·6H2O)	10 mg
Carbohydrates	Sodium pyruvate (C3H3NaO3)	10 mg
Carbohydrates	Glycerol (C3H8O3)	5 mg
Carbohydrates	N-acetyl-D-glycosamine (C8H15NO6)	10 mg
Carbohydrates	Ethanol (100 %)	20 mg
Carbohydrates	Formic acid	10 mg
Carbohydrates	Mannitol	100 µg
Amino acids	Tryptophan	5 mg
Amino acids	Casamino acids	25 mg
Vitamins	Thiamine HCl (B1)	1.0 mg
Vitamins	Biotin (B7)	1.0 µg
Vitamins	Cyanocobalamin (B12)	1.0 µg
Vitamins	Folic acid (B9)	2.0 µg
Vitamins	Niacin (B3)	0.1 mg
Vitamins	Calcium pantothenate (B5)	0.2 mg
Vitamins	Pyridoxine HCl (B6)	0.1 mg
Vitamins	Para-aminobenzoic acid (PABA)	10 µg
Salts	Ammonium chloride (NH4Cl)	0.5 mg
Salts	Sodium phosphate dibasic (Na2HPO4)	0.14 mg
Metals	Iron (III) Chloride (FeCl3)	19 µg
Metals	Manganese(II) chloride tetrahydrate (MnCl2.4H2O)	2 µg
Metals	Zinc Sulfate (ZnSO4.7H20)	0.23 µg
Metals	Cobalt(II) chloride hexahydrate (CoCl2.6H20)	0.1 µg
Metals	Ammonium Molybdate Tetrahydrate ((NH4)6Mo7O24 · 4H2)	0.1 µg
Metals	Sodium selenite (Na2SeO3)	0.2 µg
Metals	Nickel(II) chloride hexahydrate (NiCl2.6H20)	0.3 µg

## Sheet: PYG
Peptone Yeast Glucose agar
Chemical compound	quantity per L medium
peptone	0.5 g
glucose	0.5 g
Baptist yeast powder	0.5 g
NaCl	0.08g
Cysteine hydrochloride	0.5g
Calcium chloride	0.008g
MgSO4	0.008g
K2HPO4	0.04g
KH2PO4	0.04g
sodium bicarbonate	0.4g
Agar	15 g
PH 7.1-7.3
Peptone Yeast Glucose agar
idem, with glucose replaced by mannitol (0.5 g/L)

## Sheet: LB
LB agar
Chemical compound	quantity per L medium
Bacto-tryptone	10 g
Yeast extract	5 g
NaCl	2 g
Agar	15 g

## Sheet: Ec-based
1. Ectocarpus-based solidified bacterial growth medium (ECM)
Chemical compound	quantity per L medium
ground E. subulatus (5% NSW)	5g DW
Peptone	0.5 g
Provasoli nutrients	10 ml
Agar	15 g
2. Spent Ectocarpus growth medium
0.1 µm filtered spent E. subulatus growth medium (5% NSW) from 2 weeks old (SpentECM-2W)
0.1 µm filtered spent E. subulatus growth medium (5% NSW) from 7 weeks old (SpentECM-7W)
